# Supplementary material
Source: PubMed Central journal article supplement (PMC1456917)
Supplement: 7400623-s1.pdf [file 7400623-s1.pdf]

Supplementary Figure 1

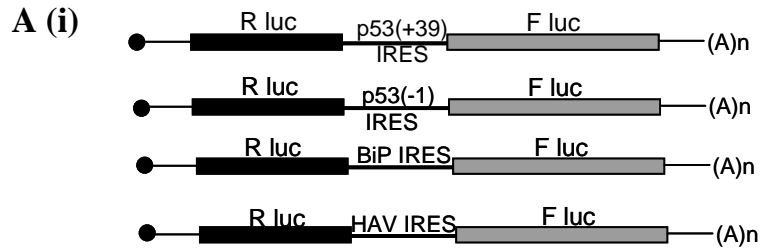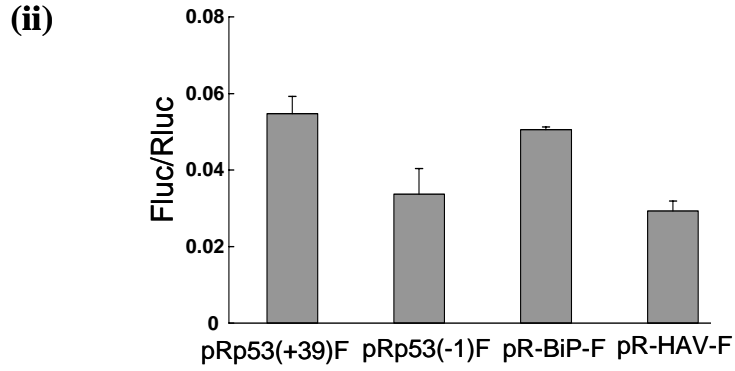

|       |       |       |       |       |
|-------|-------|-------|-------|-------|
| F luc | 3280  | 2280  | 3040  | 2000  |
| R luc | 60120 | 67960 | 60080 | 69720 |

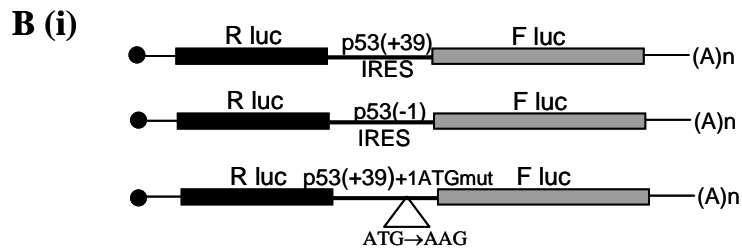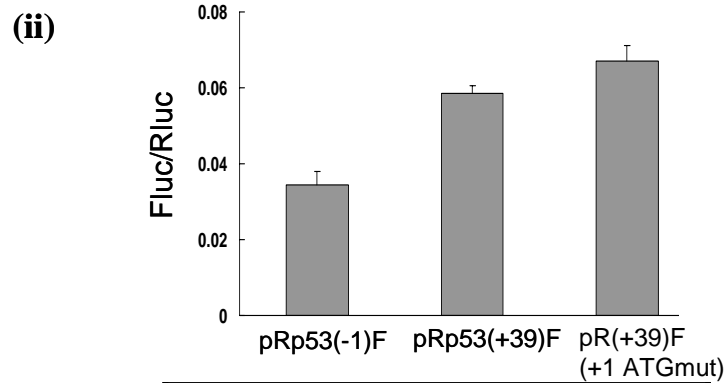

|       |       |       |       |
|-------|-------|-------|-------|
| F luc | 2440  | 3800  | 4520  |
| R luc | 71200 | 65000 | 67680 |

Supplementary Figure 1. p53 IRESs show independent activity and similar efficiency to known viral and cellular IRESs **(A i)** Schematic representation of bicistronic plasmids used in transient transfections **(ii)** Luciferase assay after transfection of bicistronic plasmids containing p53 5'UTR (+39) or (-1), BiP IRES and HAV IRESs into HeLa cells. The Fluc/Rluc ratio is shown and the mean absolute values of Fluc and Rluc activity from each construct is depicted separately for each construct. **(B i)** Schematic representation of bicistronic plasmids used in transient transfections. The ATG at position +1 within the p53 +39 leader sequence was mutated to AAG in the pR(+39)F(+1ATGmut) construct **(ii)** Luciferase assay after transfection of the described bicistronic plasmids into HeLa cells. The data is depicted as in panel A. The data in both panels represent the mean  $\pm$  SD of three independent experiments.

Supplementary Figure 2

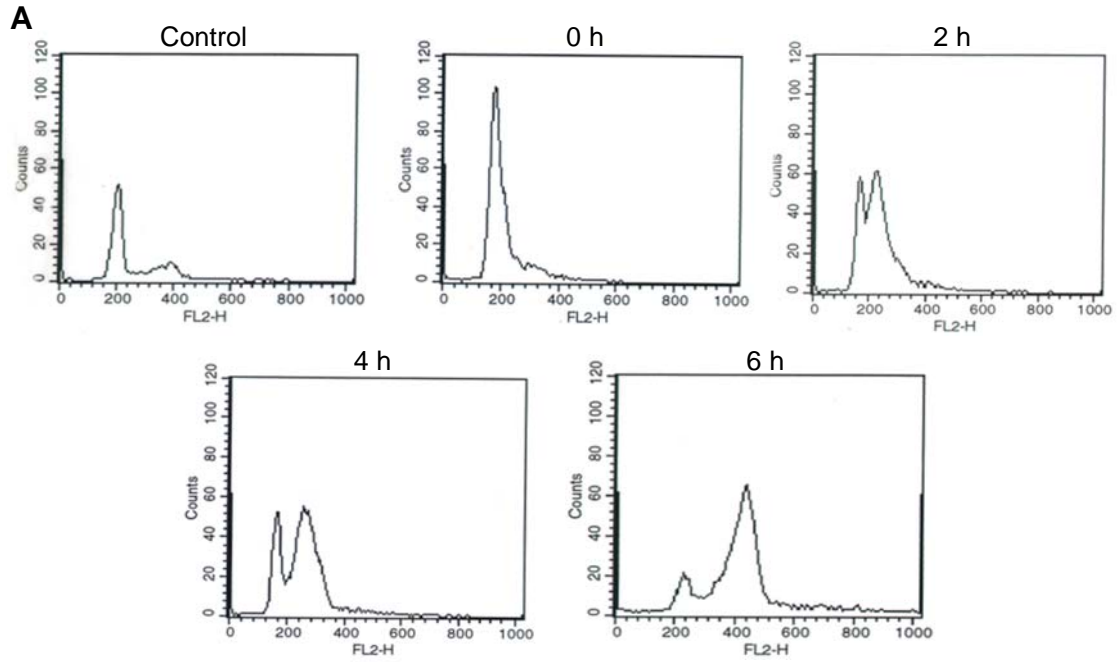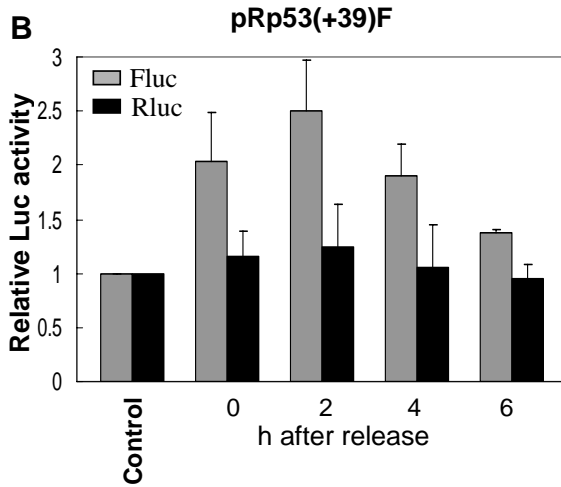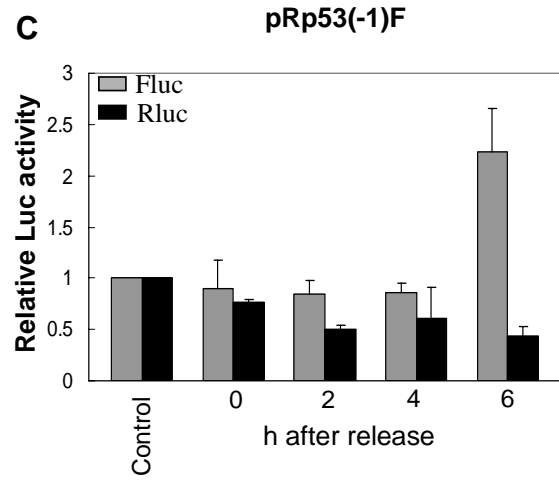

Supplementary figure 2. Cell cycle-dependent p53 IRES activity in cells synchronized at G1/S phase. **(A)** Flow-cytometric analysis of HeLa cells collected at different time-points after being synchronized at G1/S phase by double thymidine treatment. **(B)** and **(C)** Luciferase assay of cells transfected with p53 (+39) and (-1) bicistronic constructs and synchronized at G1/S phase, collected at various time points after release. Fluc and Rluc activities at each time-point are expressed as fold of the Fluc and Rluc activity obtained from non-synchronized, transfected cells. The data represent the mean ( $\pm$  SD) of three independent experiments.

Supplementary Figure 3

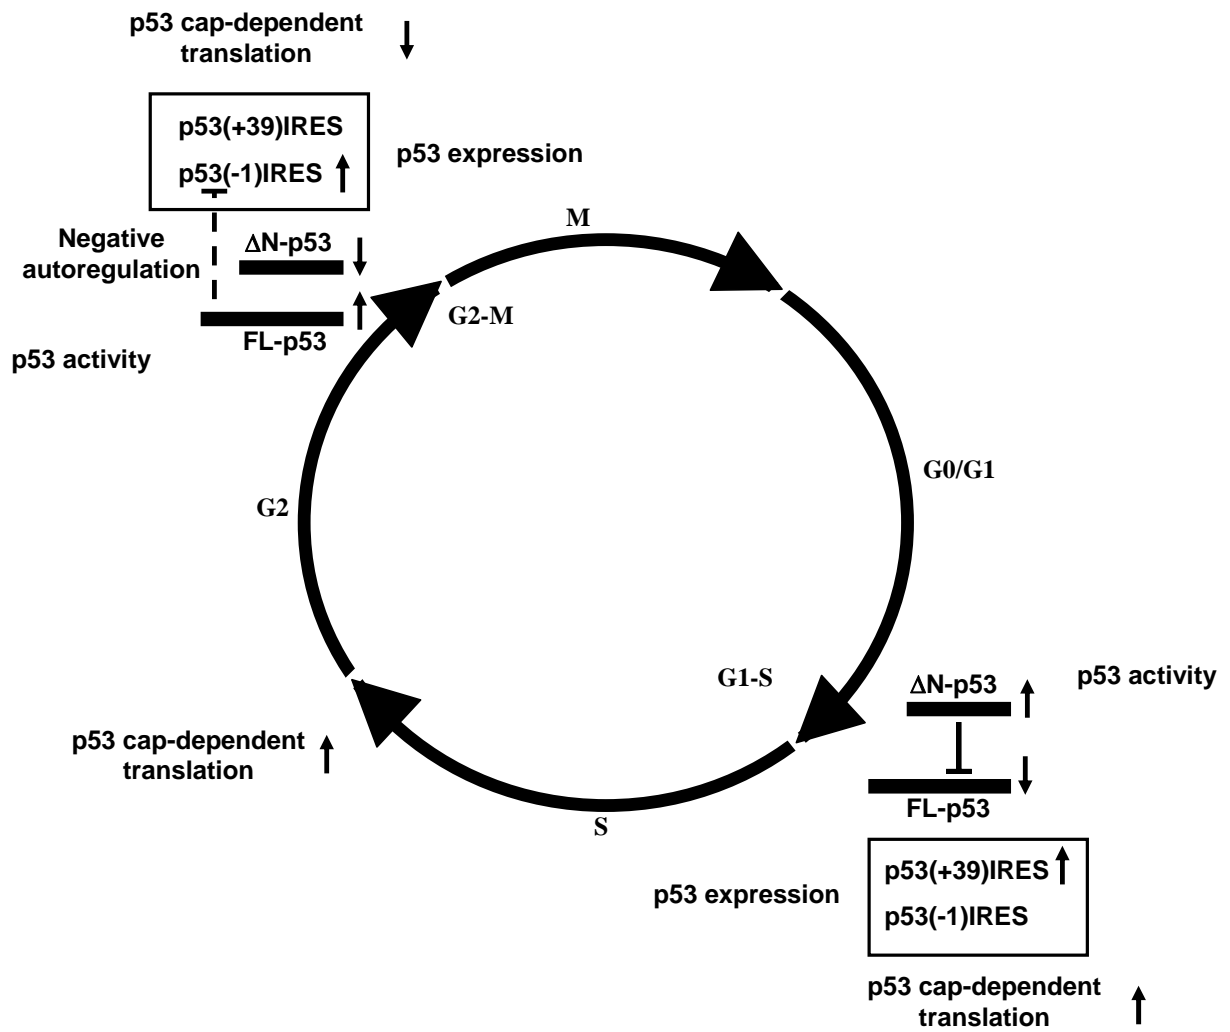

Supplementary Figure 3. Schematic representation of proposed cell cycle phase-dependent regulation of p53 IRES activity. The activity of the (+39) IRES, mediating the translation of  $\Delta$ N-p53 is highest at the G1/S transition. The high level of  $\Delta$ N-p53 generated at this stage negatively regulates the activity of full length p53, produced by cap-dependent translation. At the G2/M transition, cap-dependent translation of p53 is downregulated and full length p53 is translated via the (-1) IRES. Low activity of the (+39) IRES at this stage results in a low amount of  $\Delta$ N-p53, which will not counteract the activity of full length p53 and allows the negative autoregulation of p53 mRNA translation by p53 protein.
